# Supplementary material
Source: publisher site journal article supplement (https://www.dovepress.com/article/531434)
Supplement: Supplementary file 1 [file 531434%20Supplementary_Material.docx]

Supplementary Material

# Supplementary Tables

**Supplementary table 1** ABO blood group distribution between DLBCL patients and control groups

| Group | Blood four-type group [cases (%)] | | | | *P* value |
| --- | --- | --- | --- | --- | --- |
|  | A | B | AB | O |  |
| DLBCL patients | 65 (29.5) | 72 (32.7) | 17 (7.7) | 66 (30.0) | 0.301 |
| Control groups | 66 (30.0) | 56 (25.5) | 24 (10.9) | 74 (33.6) |  |
| Total | 131 | 128 | 41 | 140 |  |

Abbreviations: DLBCL, diffuse large B cell lymphoma.

**Supplementary table 2** Basic characteristics of 106 DLBCL patients aged over 60 years

| Characteristic | Total (cases) | Blood four-type group [cases (%)] | | *P* value |
| --- | --- | --- | --- | --- |
|  |  | B | Non-B |  |
| Total | 106 | 66 | 56 |  |
| Gender |  |  |  | 0.115 |
| Male | 51 | 16 (61.5) | 35 (43.8) |  |
| Female | 55 | 10 (38.5) | 45 (56.3) |  |
| ECOG PS |  |  |  | 0.340 |
| 0-1 | 65 | 18 (69.2) | 47 (59.4) |  |
| ≥ 2 | 41 | 8 (30.8) | 33 (41.3) |  |
| B symptoms |  |  |  | 0.747 |
| Yes | 42 | 11 (42.3) | 31 (38.8) |  |
| No | 64 | 15 (57.7) | 49 (61.3) |  |
| Extranodal sites |  |  |  | 0.577 |
| 0-1 | 70 | 16 (61.5) | 54 (67.5) |  |
| ≥ 2 | 36 | 10 (38.5) | 26 (32.5) |  |
| LDH (U/L) |  |  |  | 0.257 |
| ≤ 245 | 51 | 10 (38.5) | 41 (51.2) |  |
| > 245 | 55 | 16 (61.5) | 31 (48.8) |  |
| CRP (mg/L) a |  |  |  | 0.201 |
| ≤ 10 | 14 | 1 (7.7) | 13 (30.2) |  |
| > 10 | 42 | 12 (92.3) | 30 (69.8) |  |
| β₂ - MG (mg/L) b |  |  |  | 0.772 |
| ≤ 2.8 | 37 | 8 (53.3) | 29 (49.2) |  |
| > 2.8 | 37 | 7 (46.7) | 30 (50.8) |  |
| Ann Arbor stage |  |  |  | 0.115 |
| Ⅰ/Ⅱ | 29 | 4 (15.4) | 25 (31.3) |  |
| Ⅲ/Ⅳ | 77 | 22 (84.6) | 55 (68.8) |  |
| IPI score |  |  |  | 0.645 |
| 0-2 | 49 | 11 (42.3) | 38 (47.5) |  |
| ≥ 3 | 57 | 15 (57.7) | 42 (52.5) |  |
| Ki67 |  |  |  | 0.480 |
| ≤ 70% | 31 | 7 (28.0) | 1. 35.8) |  |
| > 70% | 61 | 18 (72.0) | 43 (64.2) |  |
| Cellular origin |  |  |  | 0.983 |
| GCB | 58 | 15 (71.4) | 43 (71.7) |  |
| Non-GCB | 23 | 6 (28.6) | 17 (28.3) |  |

Abbreviations: DLBCL, diffuse large B cell lymphoma; ECOG PS, Eastern Cooperative Oncology Group performance status; LDH, lactate dehydrogenase; CRP, C-reactive protein; β₂-MG, β₂ macroglobulin; IPI, international Prognostic Index; GCB, germinal center B cell-like.

a Data of serum CRP levels were available for 56 patients, and the CRP level > 10 mg/L was used as the cutoff value.

b Data of serum β₂-MG levels were available for 74 patients, and the β₂-MG level > 2.8 mg/L was used as the cutoff value.

Continuous variables with missing information: CRP (50 patients), β₂-MG (32 patients), Ki67 (14 patients), Cellular origin (25 patients).
